# Supplementary material for: Root lodging is a physical stress that changes gene expression from sucrose accumulation to degradation in sorghum
Source: PubMed Central journal article supplement (PMC5751775; doi:10.1186/s12870-017-1218-9), 2018-01-03
Supplement: 12870_2017_1218_MOESM1_ESM.pdf [file 12870_2017_1218_MOESM1_ESM.pdf]

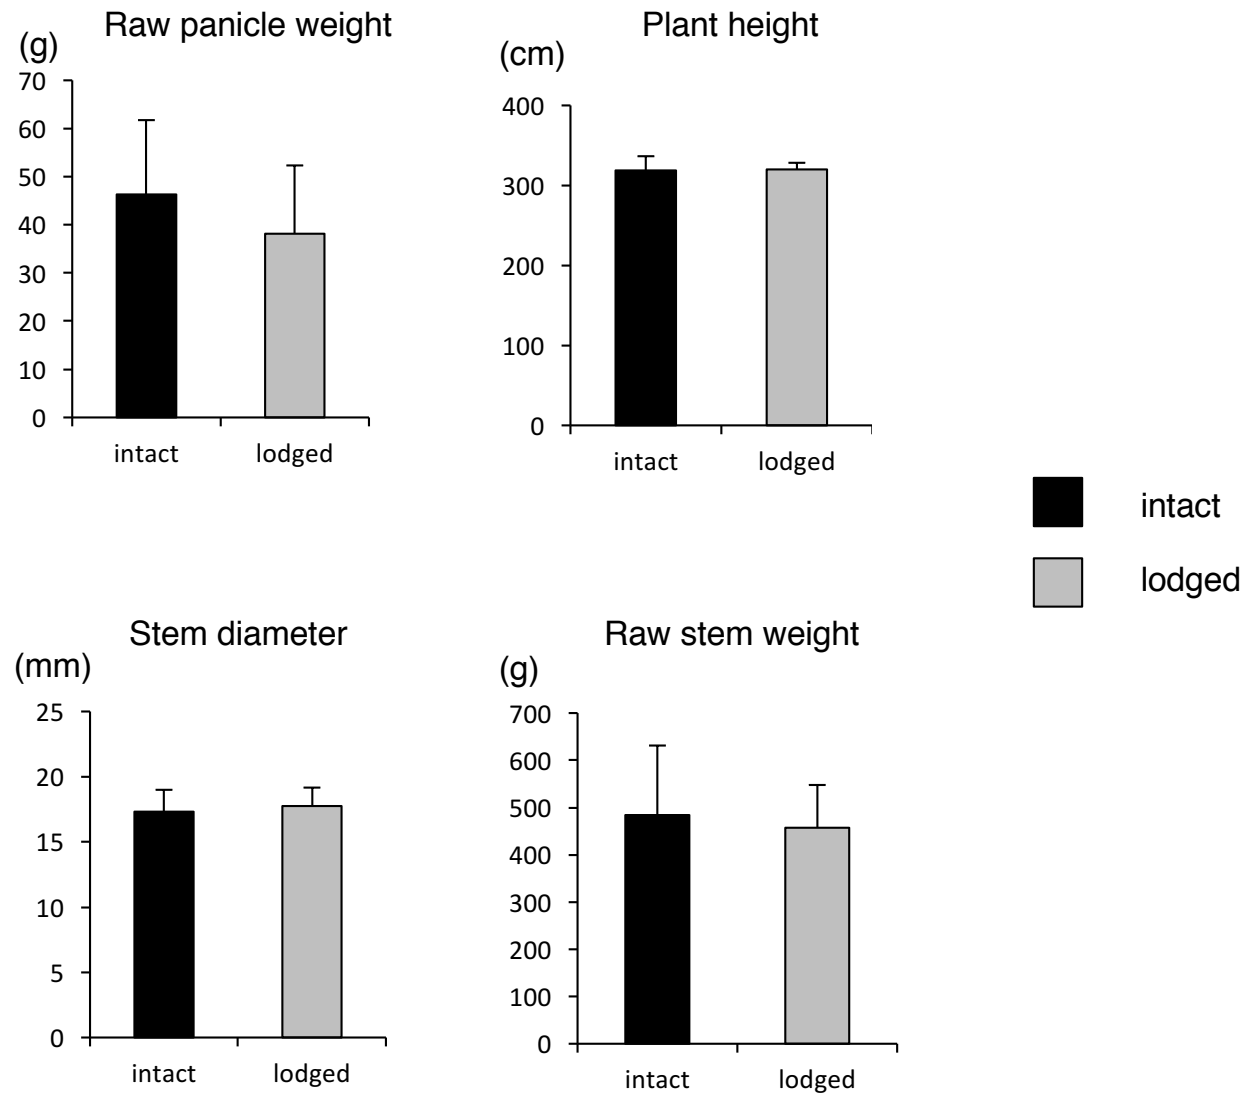

Figure S1
