# Supplementary material for: Root lodging is a physical stress that changes gene expression from sucrose accumulation to degradation in sorghum
Source: PubMed Central journal article supplement (PMC5751775; doi:10.1186/s12870-017-1218-9), 2018-01-03
Supplement: 12870_2017_1218_MOESM3_ESM.pdf [file 12870_2017_1218_MOESM3_ESM.pdf]

# Calvin cycle

| Gene name     | Reaction EC | Enzymatic activity                | FPKM_intact | FPKM_lodged | significant |
|---------------|-------------|-----------------------------------|-------------|-------------|-------------|
| Sb10g002960.1 | 2.2.1.1     | transketolase                     | 23.6        | 32.7        | no          |
| Sb09g020140.1 | 2.2.1.1     | transketolase                     | 183.8       | 137.7       | no          |
| Sb02g005410.1 | 2.2.1.1     | transketolase                     | 0.2         | 1.8         | yes         |
| Sb02g005380.1 | 2.2.1.1     | transketolase                     | 0.3         | 2.0         | yes         |
| Sb10g002960.1 | 2.2.1.1     | transketolase                     | 23.6        | 32.7        | no          |
| Sb09g020140.1 | 2.2.1.1     | transketolase                     | 183.8       | 137.7       | no          |
| Sb02g005410.1 | 2.2.1.1     | transketolase                     | 0.2         | 1.8         | yes         |
| Sb02g005380.1 | 2.2.1.1     | transketolase                     | 0.3         | 2.0         | yes         |
| Sb10g002220.1 | 2.2.1.1     | transketolase                     | 184.9       | 132.2       | no          |
| Sb10g002250.1 | 2.2.1.1     | transketolase                     | 1.0         | 0.5         | no          |
| Sb09g005230.1 | 2.2.1.1     | transketolase                     | 8.7         | 22.3        | yes         |
| Sb06g004280.1 | 2.2.1.1     | transketolase                     | 1.0         | 1.8         | no          |
| Sb10g002220.1 | 2.2.1.1     | transketolase                     | 184.9       | 132.2       | no          |
| Sb10g002250.1 | 2.2.1.1     | transketolase                     | 1.0         | 0.5         | no          |
| Sb09g005230.1 | 2.2.1.1     | transketolase                     | 8.7         | 22.3        | yes         |
| Sb06g004280.1 | 2.2.1.1     | transketolase                     | 1.0         | 1.8         | no          |
| Sb01g033450.1 | 2.7.1.19    | phosphoribulokinase               | 17.0        | 23.8        | no          |
| Sb06g012270.1 | 2.7.1.19    | phosphoribulokinase               | 3.0         | 5.5         | no          |
| Sb06g027270.1 | 2.7.1.19    | phosphoribulokinase               | 3.1         | 1.7         | no          |
| Sb04g030950.1 | 2.7.1.19    | phosphoribulokinase               | 205.9       | 130.2       | yes         |
| Sb03g037165.1 | 2.7.2.3     | phosphoglycerate kinase           | 0.0         | 0.0         | no          |
| Sb01g020930.1 | 2.7.2.3     | phosphoglycerate kinase           | 1.5         | 1.9         | no          |
| Sb04g004690.1 | 2.7.2.3     | phosphoglycerate kinase           | 574.7       | 535.9       | no          |
| Sb09g024340.1 | 2.7.2.3     | phosphoglycerate kinase           | 102.8       | 77.2        | no          |
| Sb10g026710.1 | 2.7.2.3     | phosphoglycerate kinase           | 41.1        | 60.9        | no          |
| Sb10g026540.1 | 3.1.3.11    | fructose-1,6-bisphosphatase       | 8.1         | 9.1         | no          |
| Sb09g021620.1 | 3.1.3.11    | fructose-1,6-bisphosphatase       | 83.5        | 39.2        | yes         |
| Sb03g040900.1 | 3.1.3.11    | fructose-1,6-bisphosphatase       | 147.7       | 61.6        | yes         |
| Sb01g039980.1 | 3.1.3.11    | fructose-1,6-bisphosphatase       | 51.0        | 34.9        | yes         |
| Sb08g002160.1 | 4.1.1.39    | ribulose-bisphosphate carboxylase | 14.0        | 13.8        | no          |
| Sb01g044490.1 | 4.1.1.39    | ribulose-bisphosphate carboxylase | 32.0        | 23.8        | no          |
| Sb05g003480.1 | 4.1.1.39    | ribulose-bisphosphate carboxylase | 645.4       | 720.1       | no          |
| Sb04g001123.1 | 4.1.2.13    | fructose-bisphosphate aldolase    | 21.3        | 18.3        | no          |
| Sb01g046740.1 | 4.1.2.13    | fructose-bisphosphate aldolase    | 14.5        | 19.6        | no          |
| Sb01g021020.1 | 4.1.2.13    | fructose-bisphosphate aldolase    | 58.5        | 58.3        | no          |
| Sb10g023850.1 | 4.1.2.13    | fructose-bisphosphate aldolase    | 2.7         | 2.0         | no          |
| Sb08g004500.1 | 4.1.2.13    | fructose-bisphosphate aldolase    | 424.4       | 300.1       | no          |
| Sb05g004590.1 | 4.1.2.13    | fructose-bisphosphate aldolase    | 215.5       | 54.5        | yes         |
| Sb04g019020.1 | 4.1.2.13    | fructose-bisphosphate aldolase    | 115.9       | 151.9       | no          |
| Sb03g008050.1 | 4.1.2.13    | fructose-bisphosphate aldolase    | 75.7        | 106.2       | no          |
| Sb03g043140.1 | 4.1.2.13    | fructose-bisphosphate aldolase    | 768.0       | 1244.6      | no          |
| Sb02g029250.1 | 5.1.3.1     | ribulose-phosphate 3-epimerase    | 74.6        | 81.3        | no          |
| Sb01g045920.1 | 5.1.3.1     | ribulose-phosphate 3-epimerase    | 195.0       | 186.6       | no          |
| Sb03g006130.1 | 5.3.1.1     | ribulose-phosphate 3-epimerase    | 430.7       | 546.3       | no          |
| Sb03g039480.1 | 5.3.1.1     | ribulose-phosphate 3-epimerase    | 17.4        | 8.4         | yes         |
| Sb02g031030.1 | 5.3.1.1     | ribulose-phosphate 3-epimerase    | 148.0       | 125.8       | no          |

Figure S2
