# Supplementary material for: Root lodging is a physical stress that changes gene expression from sucrose accumulation to degradation in sorghum
Source: PubMed Central journal article supplement (PMC5751775; doi:10.1186/s12870-017-1218-9), 2018-01-03
Supplement: 12870_2017_1218_MOESM4_ESM.pdf [file 12870_2017_1218_MOESM4_ESM.pdf]

## C4 photosynthesis

| Gene name     | Reaction EC | Enzymatic activity              | FPKM_intact | FPKM_lodged | significant |
|---------------|-------------|---------------------------------|-------------|-------------|-------------|
| Sb10g021330.1 | 4.1.1.31    | phosphoenolpyruvate carboxylase | 142.3       | 105.8       | no          |
| Sb07g014960.1 | 4.1.1.31    | phosphoenolpyruvate carboxylase | 4.3         | 14.6        | yes         |
| Sb04g008720.1 | 4.1.1.31    | phosphoenolpyruvate carboxylase | 142.7       | 125.0       | no          |
| Sb03g008410.1 | 4.1.1.31    | phosphoenolpyruvate carboxylase | 0.1         | 0.1         | no          |
| Sb03g035090.1 | 4.1.1.31    | phosphoenolpyruvate carboxylase | 22.5        | 23.2        | no          |
| Sb02g021090.1 | 4.1.1.31    | phosphoenolpyruvate carboxylase | 36.9        | 89.8        | yes         |
| Sb07g023910.1 | 1.1.1.82    | malate dehydrogenase 1          | 33.0        | 21.4        | yes         |
| Sb07g023920.1 | 1.1.1.82    | malate dehydrogenase 1          | 167.1       | 132.9       | no          |
| Sb09g019930.1 | 2.7.9.1     | pyruvate phosphate dikinase     | 437.0       | 354.4       | no          |
| Sb01g031660.1 | 2.7.9.1     | pyruvate phosphate dikinase     | 3.3         | 4.7         | no          |

Figure S3
